# Supplementary material
Source: PubMed Central journal article supplement (PMC2857135)
Supplement: supp_M109.067710_jbc.M109.067710-1.pdf [file supp_M109.067710_jbc.M109.067710-1.pdf]

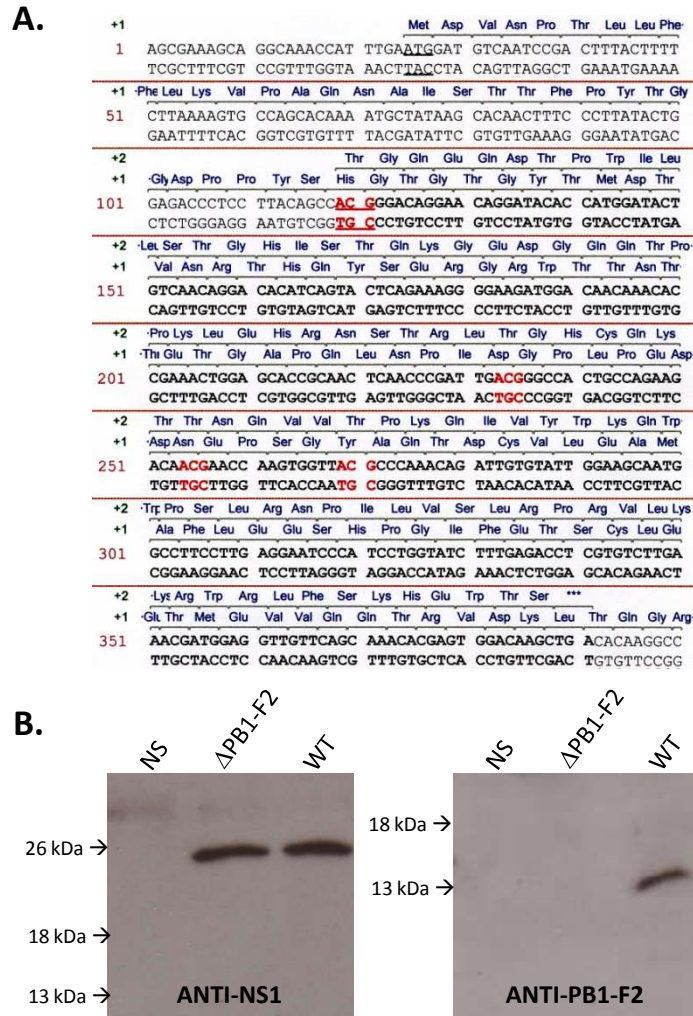

Fig. S1. Sequence representation of segment 2 of the recombinant A/WSN/1933 (H1N1) virus knocked-out for PB1-F2 expression (nucleotides 1 to 400). (A) The +1 reading-frame coding for PB1 and the +2 reading frame coding for PB1-F2 are translated in blue (amino acids designed in the three letter code). The sequence coding for PB1-F2 originally is represented in bold. The position of the start codons of PB1 and PB1-F2 are underlined. The position of the 4 in-frame start codons mutated to produce the recombinant  $\Delta$ PB1-F2 virus is indicated in red. (B) Lysates of cells collected at 12 h post-infection were separated by SDS-PAGE followed by western blot analysis with anti-NS1 (right panel) or anti-PB1-F2 antibodies (left panel). The relative molecular weights (shown in thousands) were determined by reference to marker proteins.
