# Supplementary material
Source: PubMed Central journal article supplement (PMC2857135)
Supplement: supp_M109.067710_jbc.M109.067710-2.pdf [file supp_M109.067710_jbc.M109.067710-2.pdf]

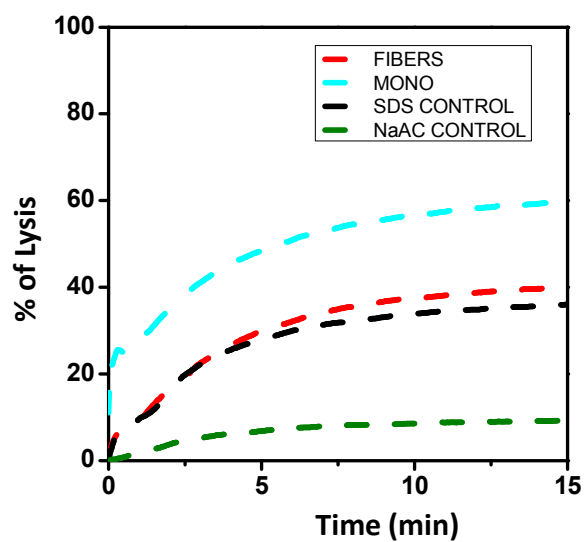

**Fig. S2.** Membrane Permeabilization by native WSN PB1-F2 variant and PB1-F2 fibers. Permeabilization of calcein-containing liposomes upon the addition of 10 nM of WSN PB1-F2 variant in 10 mM Na-acetate pH5 (MONO) was compared with permeabilization of liposomes upon addition of preformed PB1-F2 fibers in presence of 0.01% SDS (FIBERS). Control was obtained with liposomes in Na-acetate buffer with 0.01% SDS (SDS CONTROL) or without SDS (NaAC CONTROL).
